# Supplementary material for: Blocking the angiopoietin-2–dependent integrin β-1 signaling axis abrogates small cell lung cancer invasion and metastasis
Source: JCI journal article supplement (doi:10.1172/jci.insight.166402), 2024-05-21
Supplement: sd2 [file 2]

You are being redirected.
