# Supplementary material for: Blocking the angiopoietin-2–dependent integrin β-1 signaling axis abrogates small cell lung cancer invasion and metastasis
Source: JCI journal article supplement (doi:10.1172/jci.insight.166402), 2024-05-21

Figure 7 D

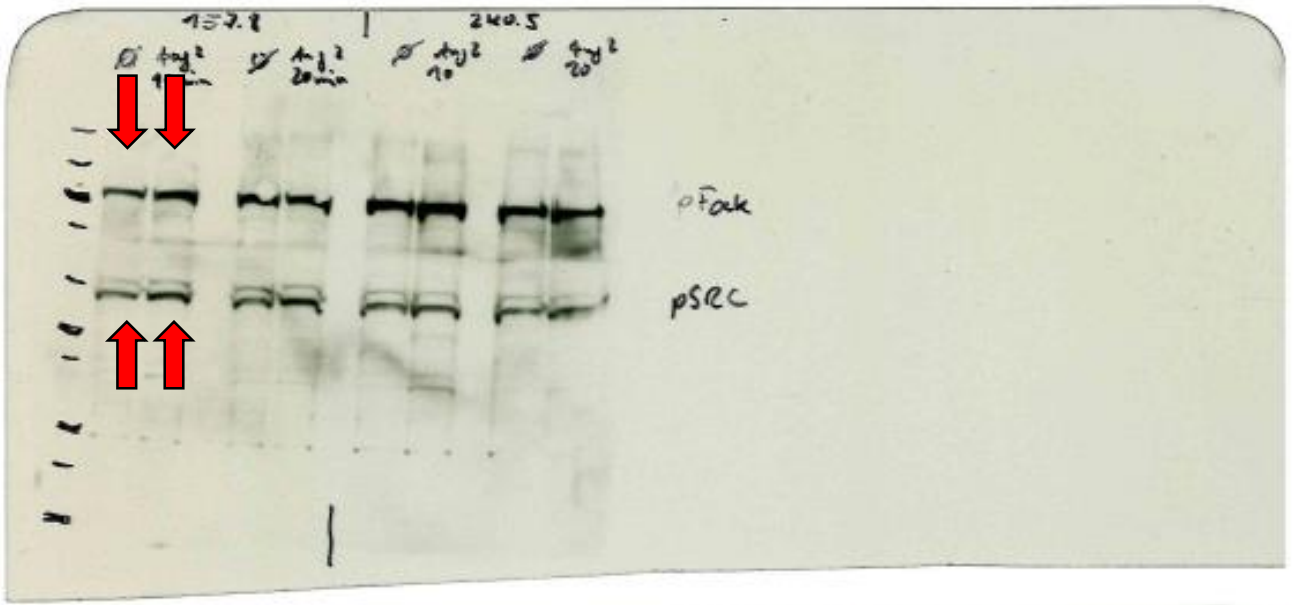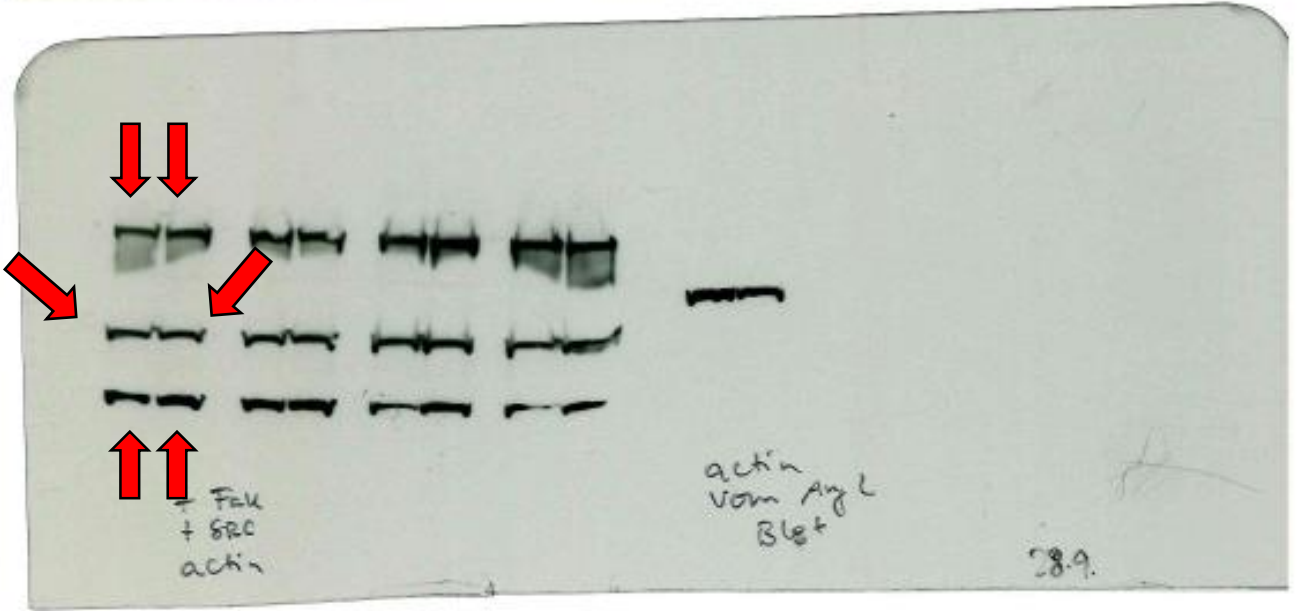

Figure 7F

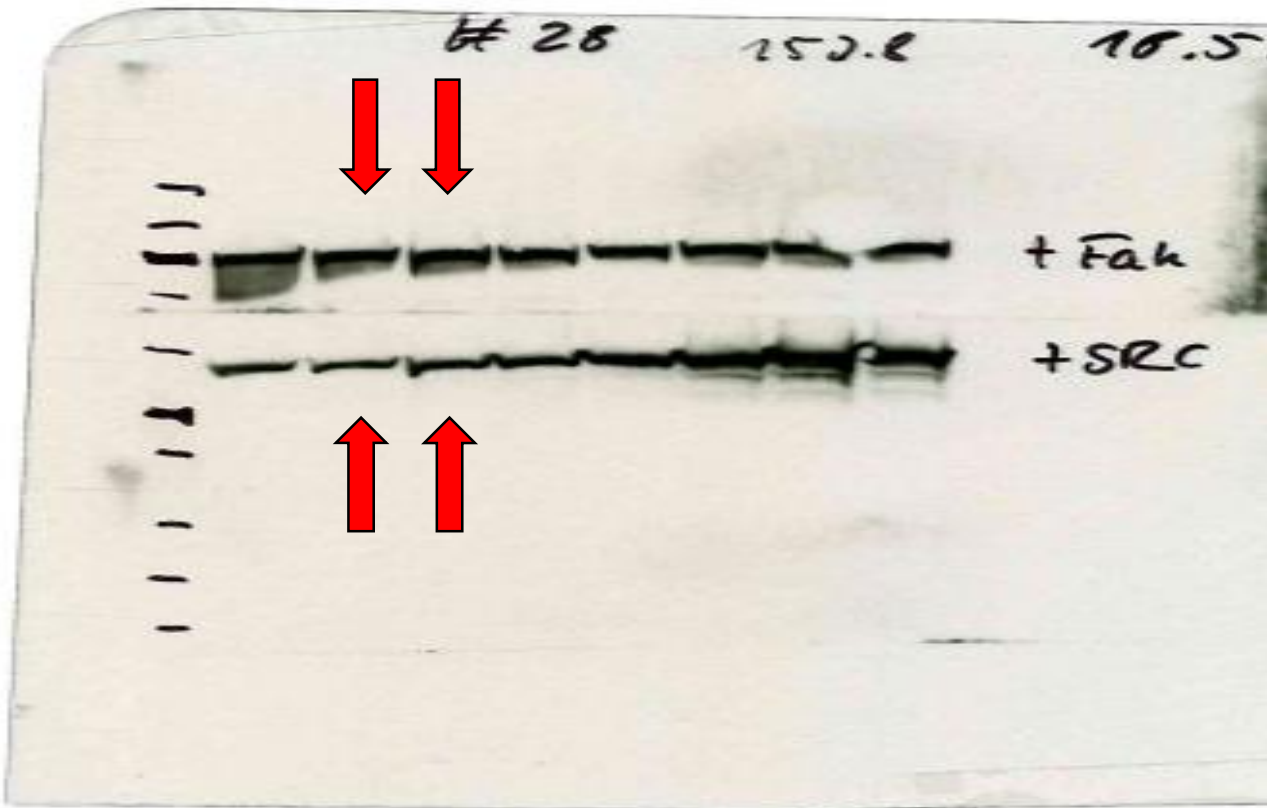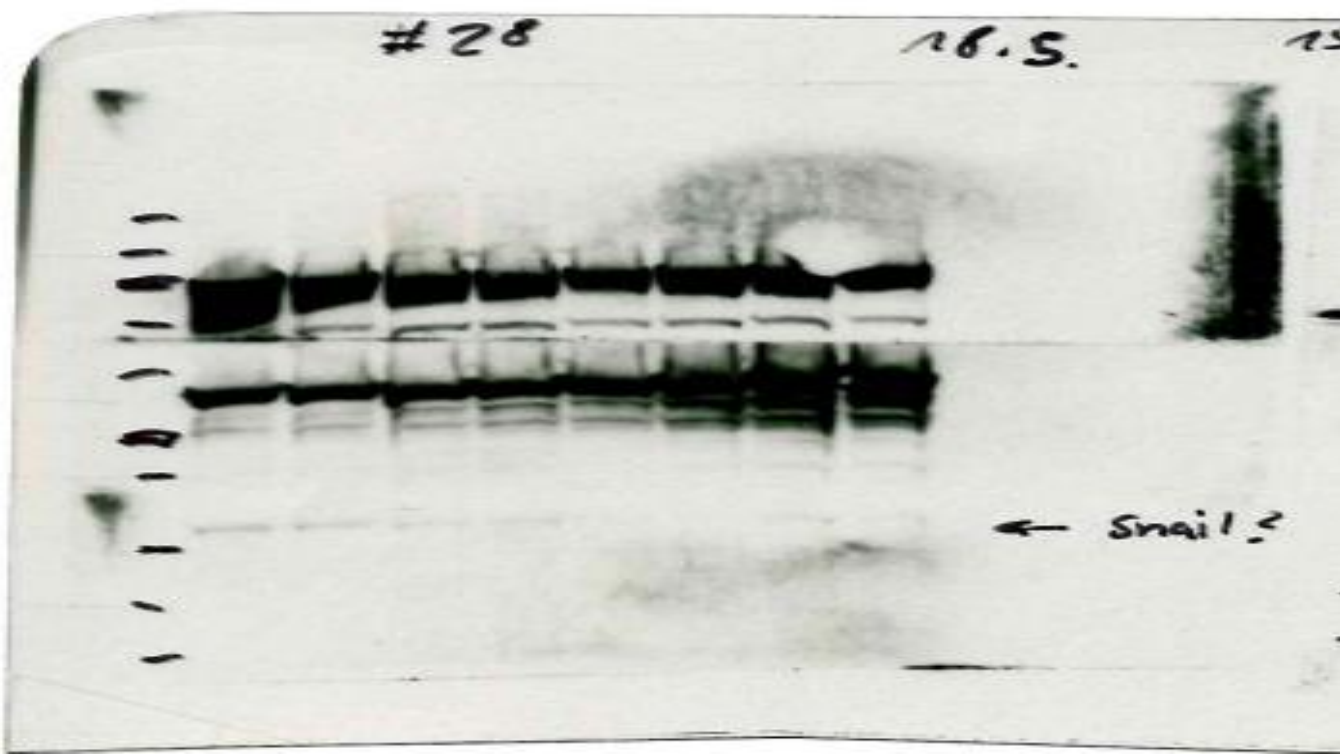

Figure 7F

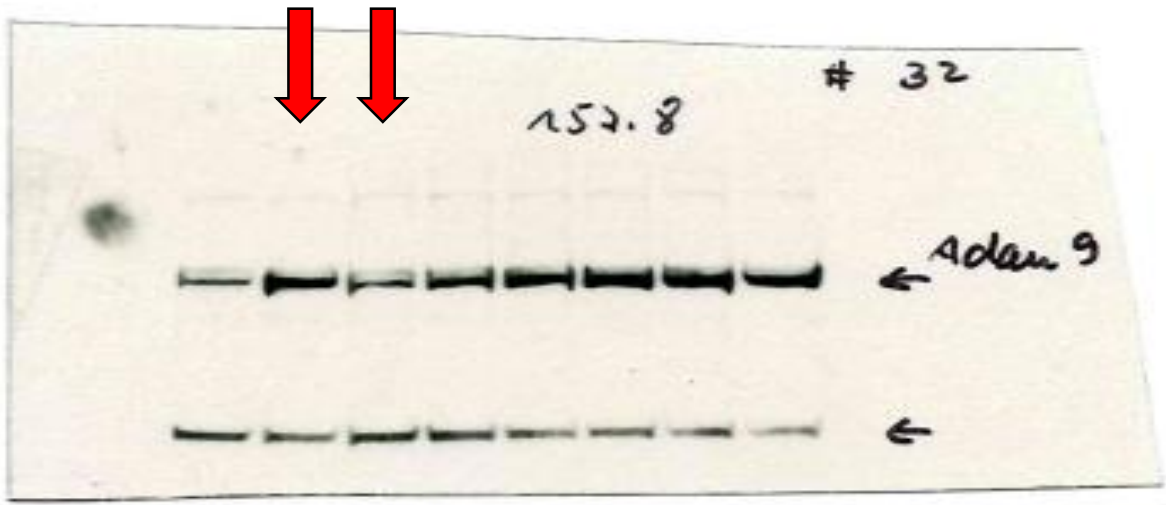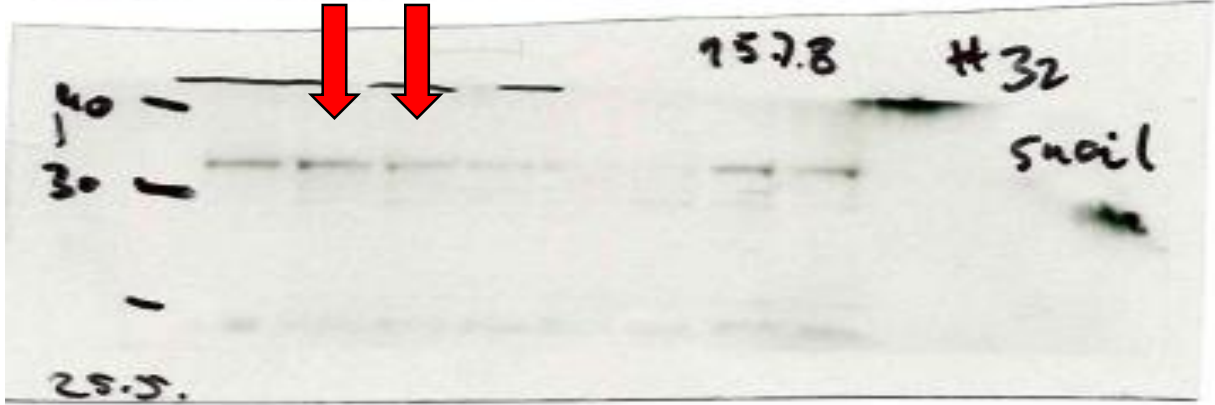

Figure 7F

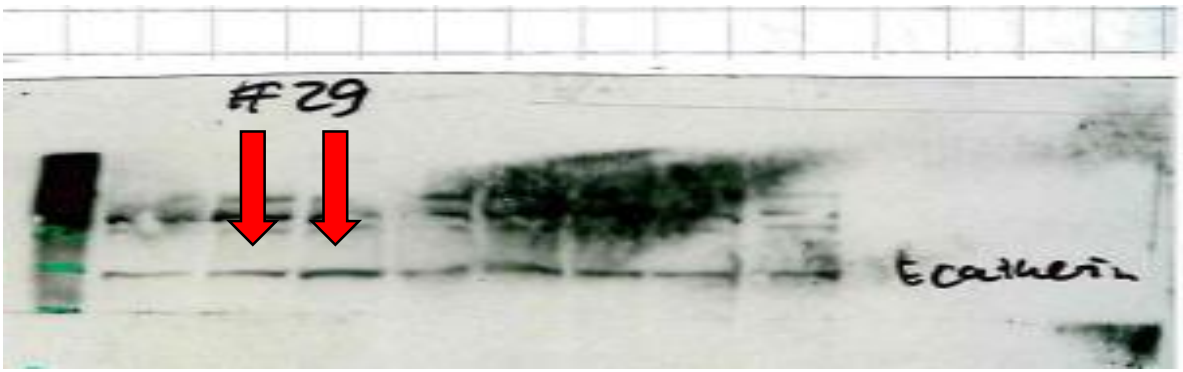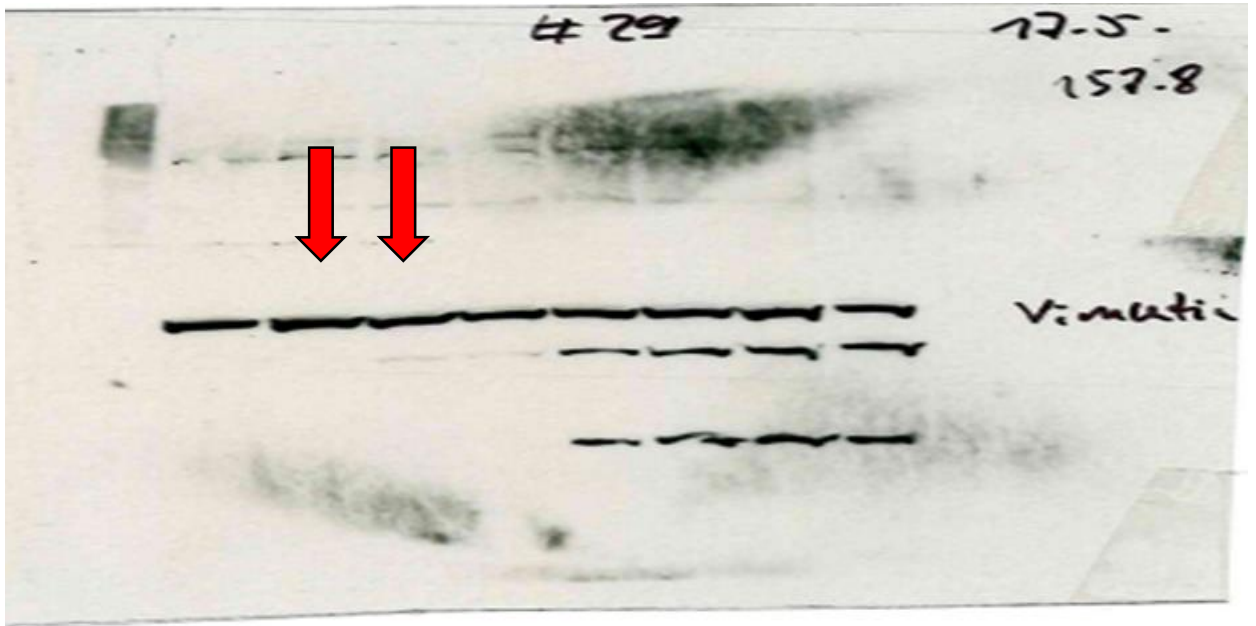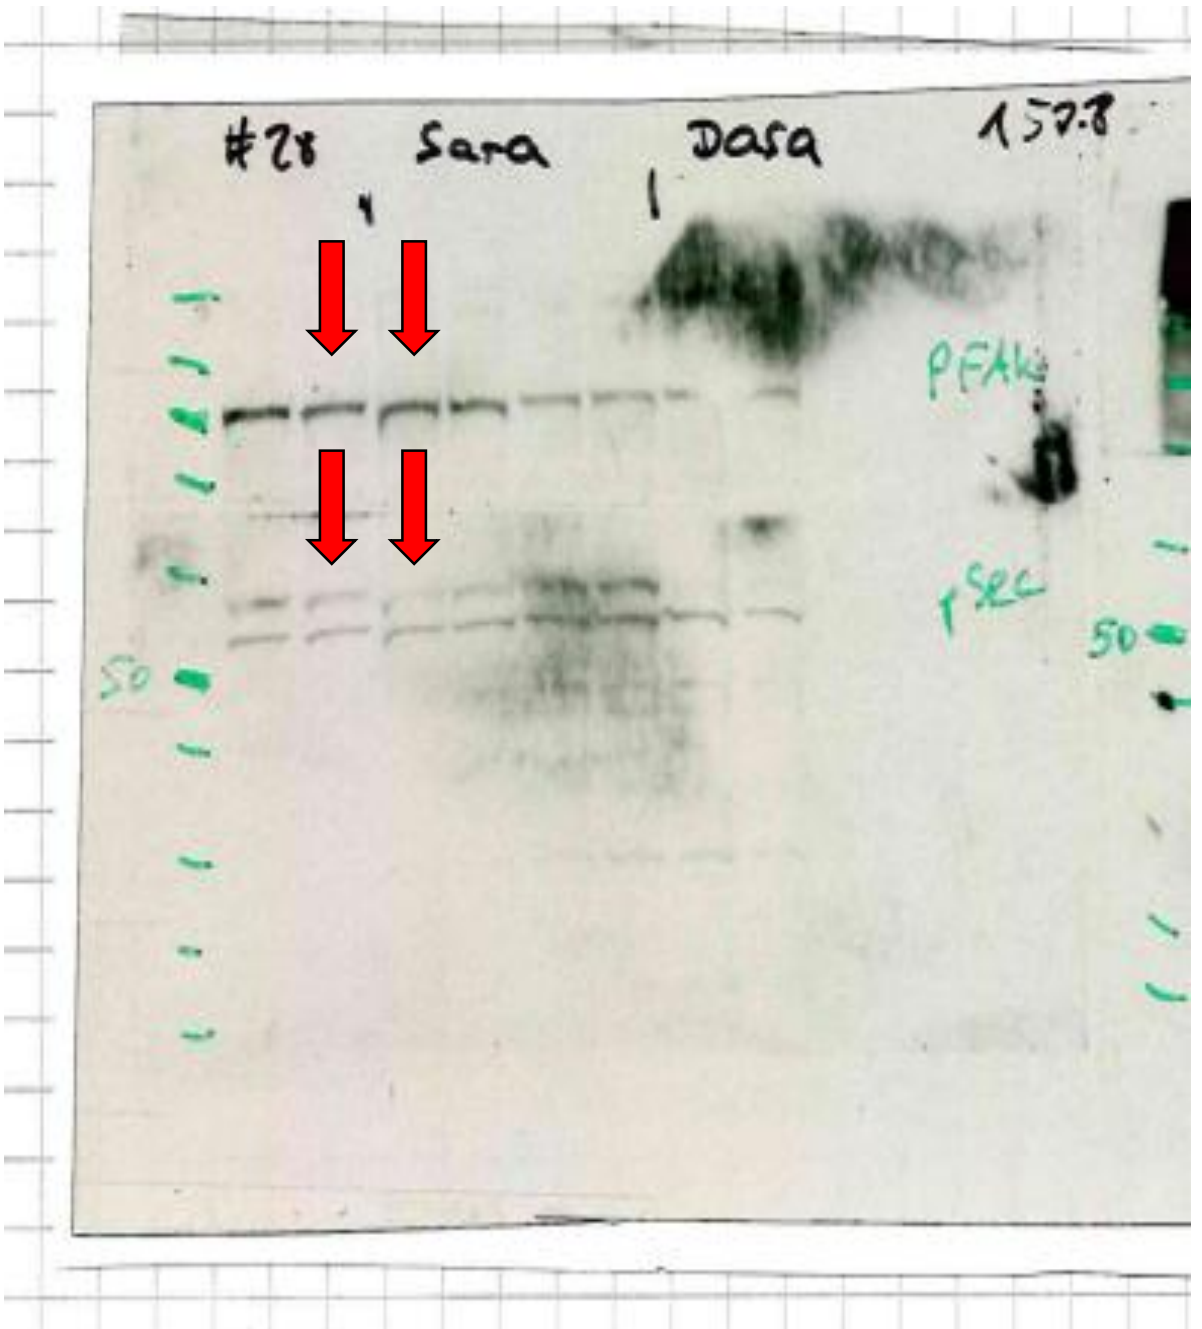

Figure 7F

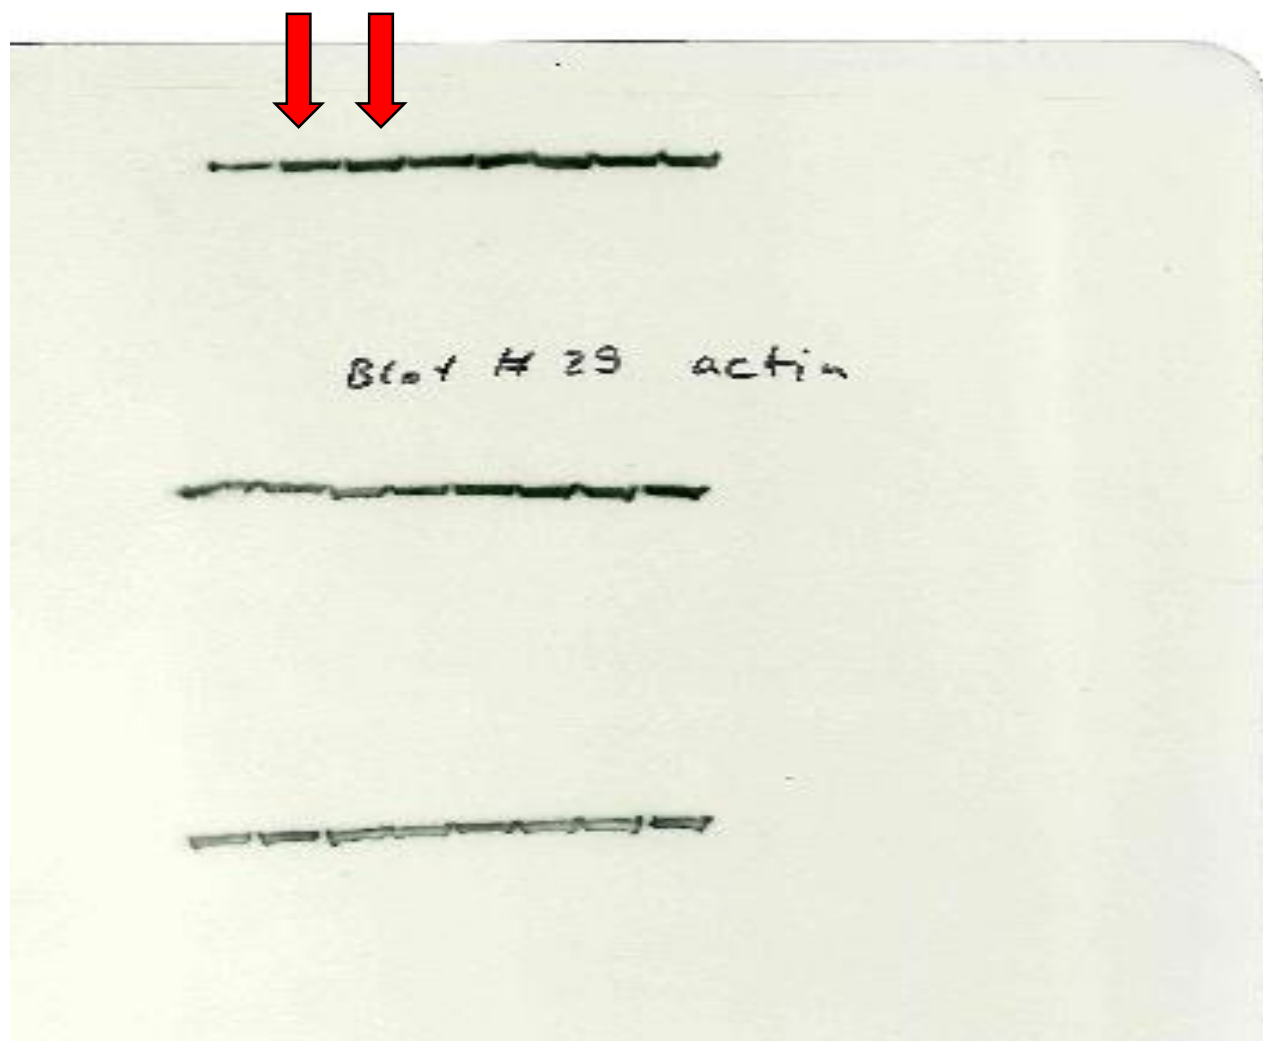

Figure S11A

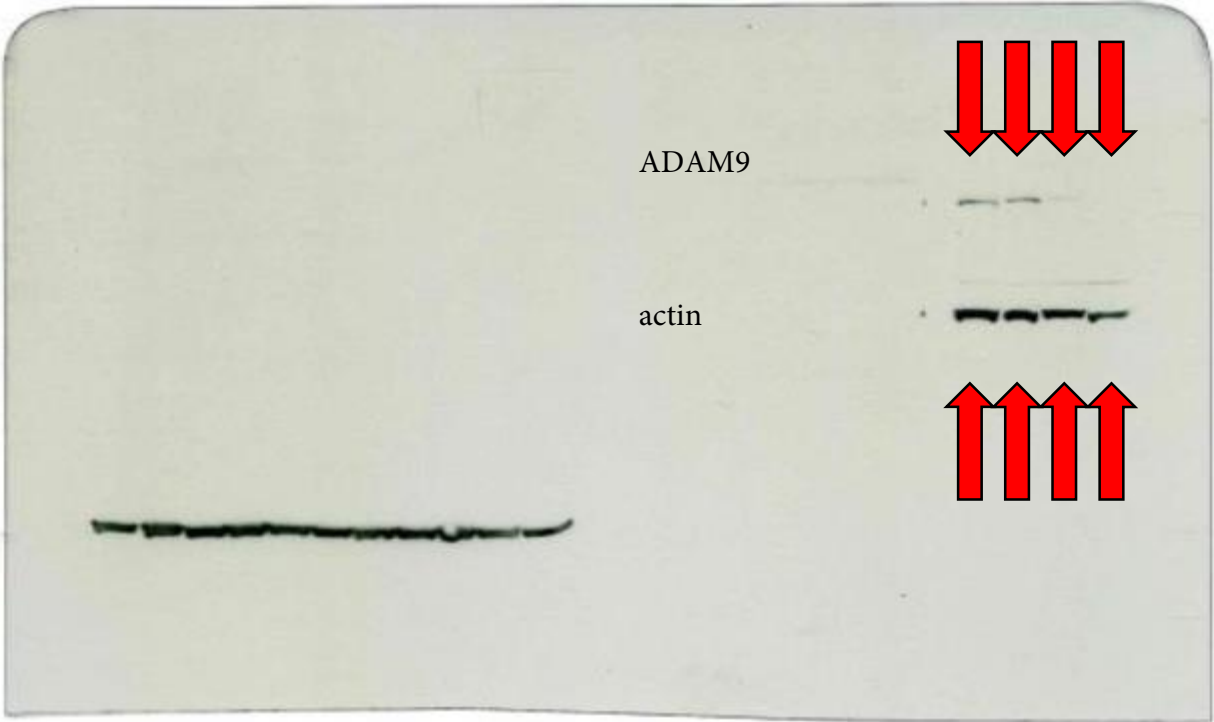

Figure S11F

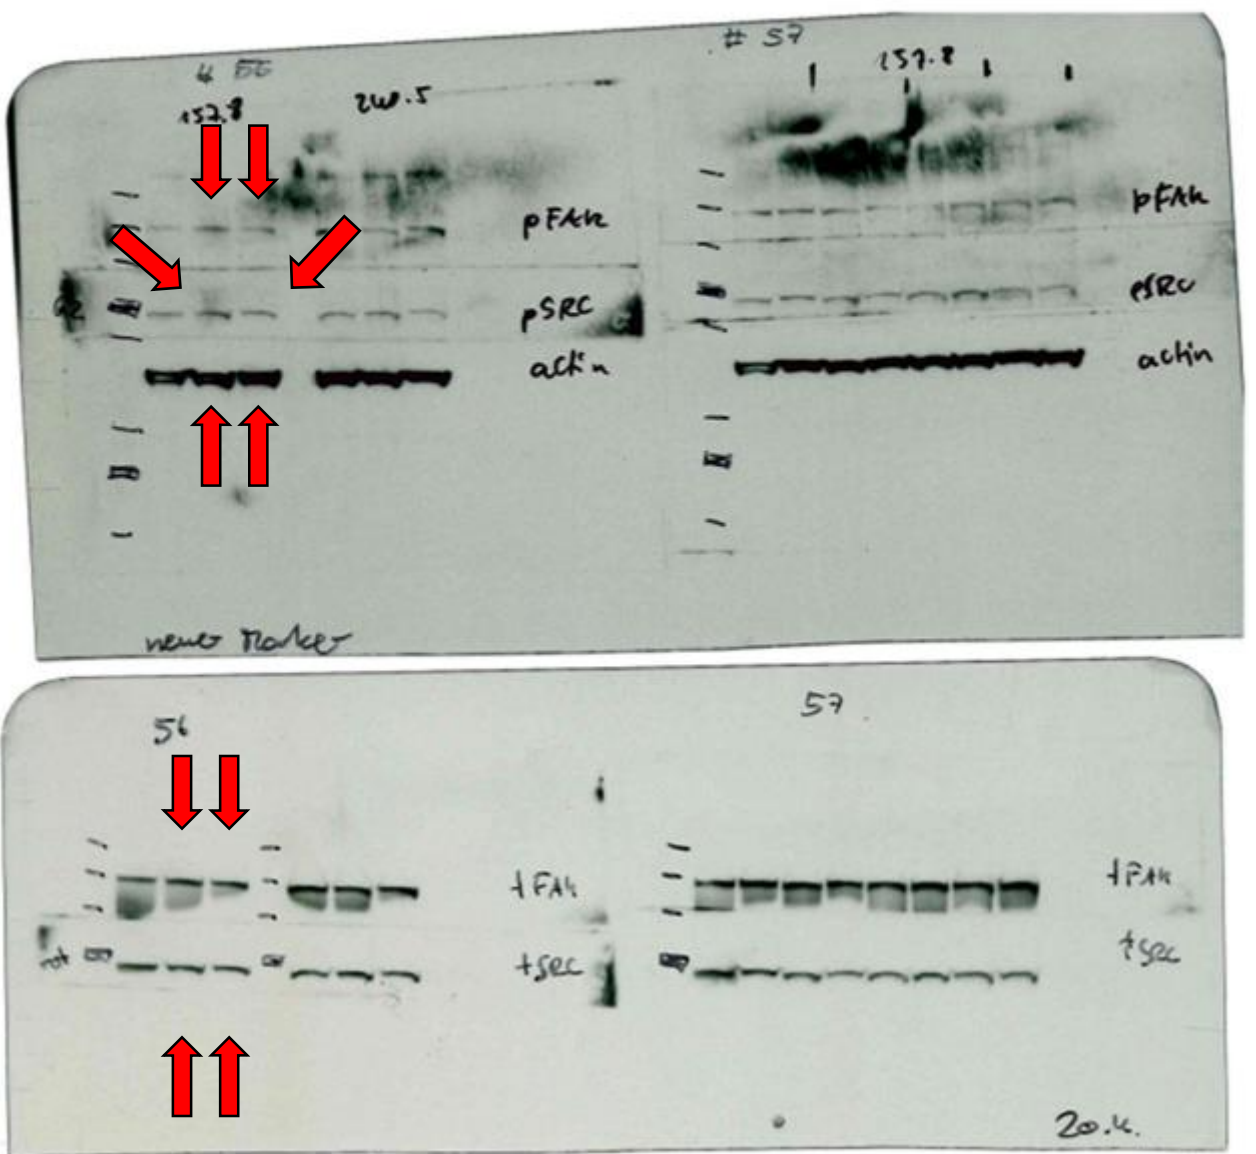

Figure S13C

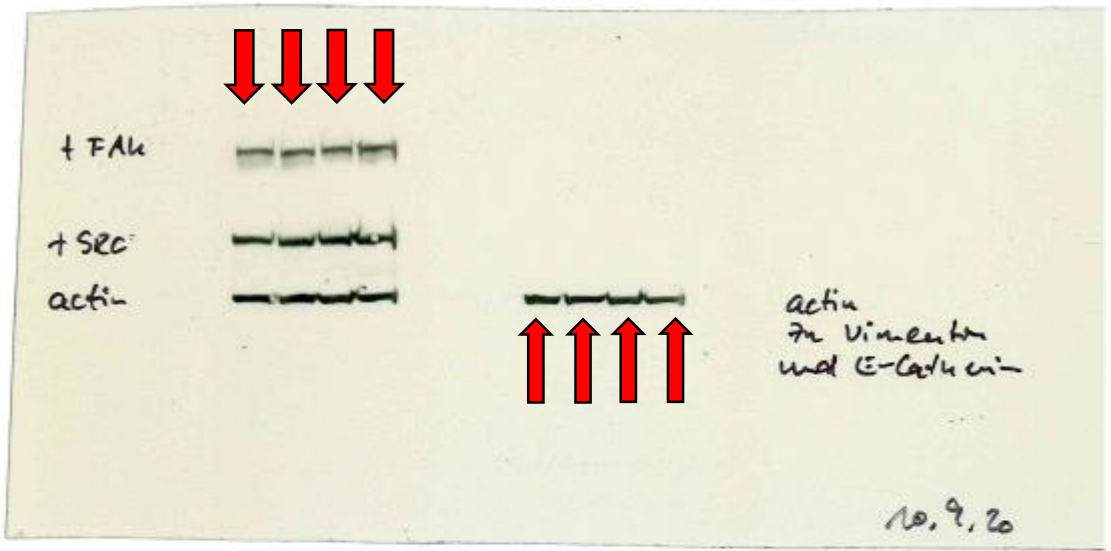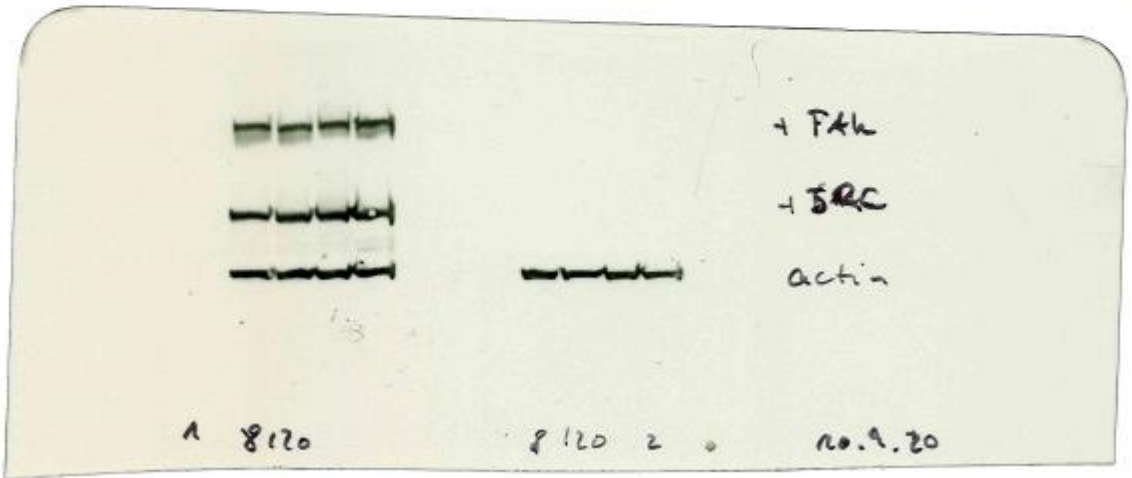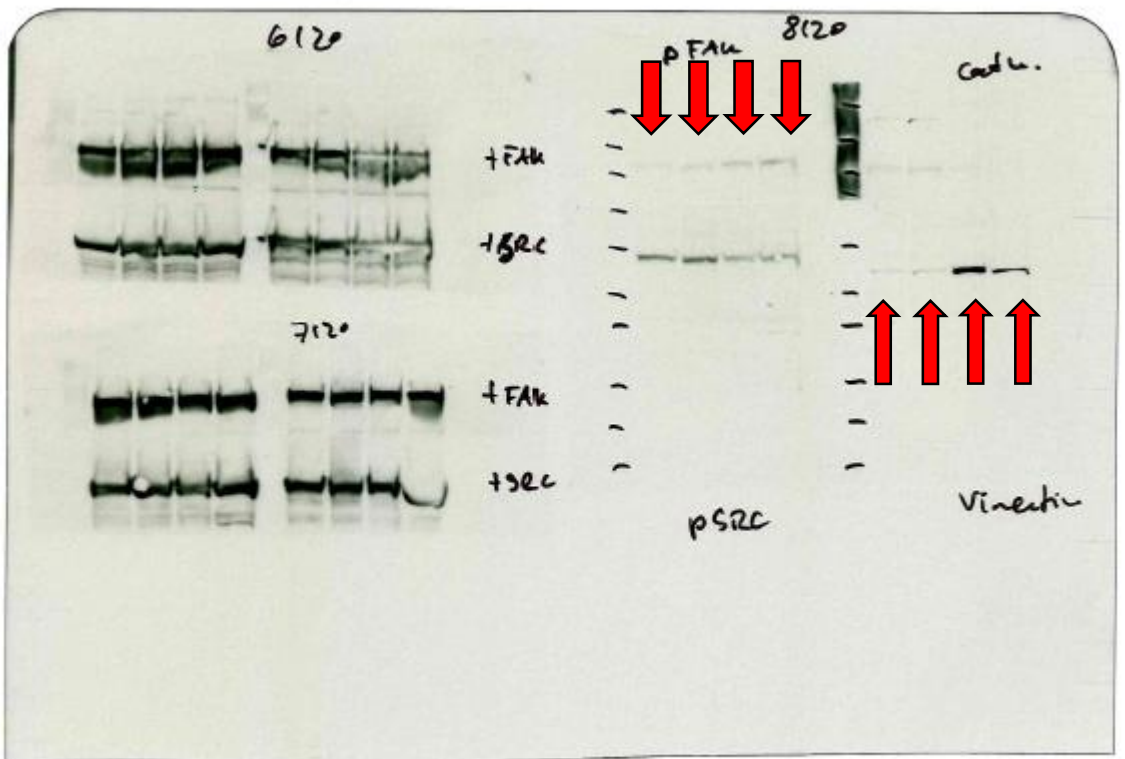

Supplement: sd2 [file 2]
